# Supplementary material
Source: publisher figshare collection journal article supplement (https://acs.figshare.com/ndownloader/files/4461715)
Supplement: Supplementary file 1 [file 4461715]

# Graphene oxide-MnO<sub>2</sub> Nanocomposites for Supercapacitors

*Sheng Chen, Junwu Zhu\*, Xiaodong Wu, Qiaofeng Han, and Xin Wang\**

Key Laboratory for Soft Chemistry and Functional Materials (Nanjing University of Science and Technology), Ministry of Education, Nanjing 210094, China

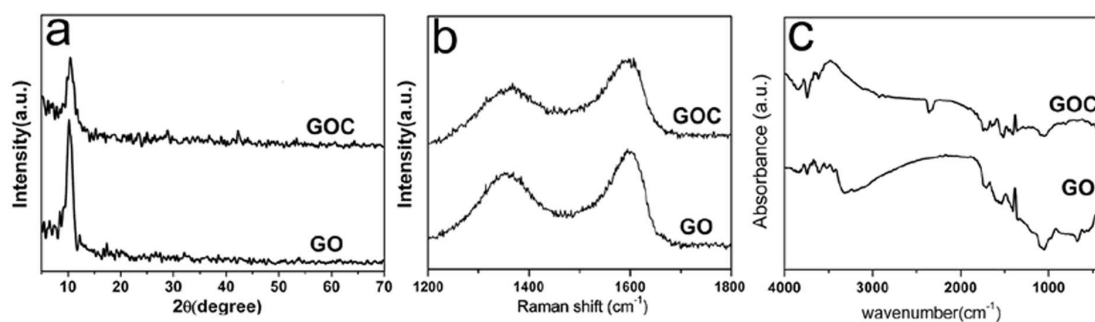

**Figure 1S.** (a)XRD patterns (b) Raman (c) FTIR spectra of GO and GOC.

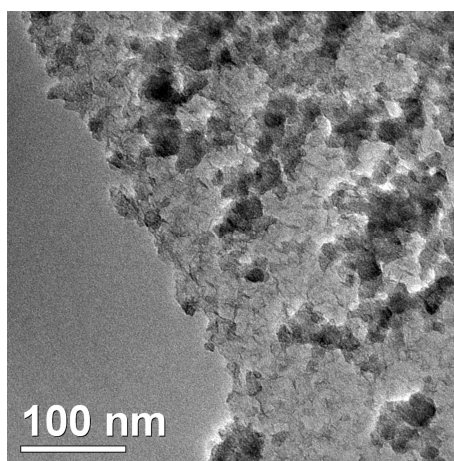

**Figure 2S.** TEM images of as-obtained products *via* a similar procedure using only GO and KMnO<sub>4</sub> as the precursors.

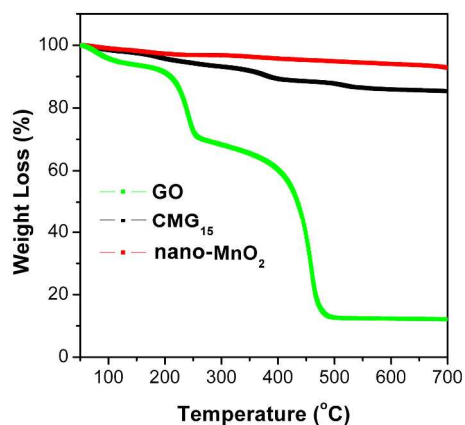

**Figure 3S.** TG curves of GO, nano-MnO<sub>2</sub>, and CMG<sub>15</sub> at a heating rate of 20 °C·min<sup>-1</sup> in air flow.

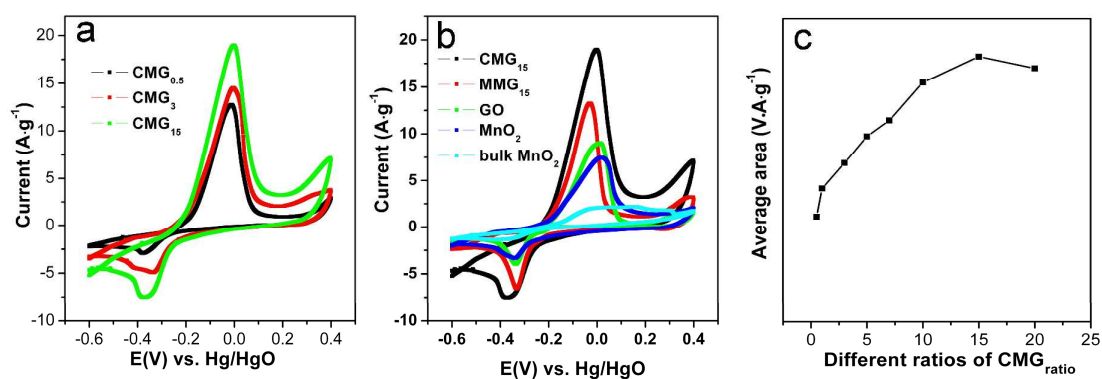

**Figure 4S.** CVs of (a) CMG<sub>0.5</sub>, CMG<sub>3</sub>, and CMG<sub>15</sub>; (b) bulk MnO<sub>2</sub>, GO, CMG<sub>15</sub>, nano-MnO<sub>2</sub> and MMG<sub>15</sub> at 5 mV·s<sup>-1</sup> in 6 M KOH solution; (c) Plot of average area of CV curves as a function of different ratios of CMG<sub>ratio</sub>.

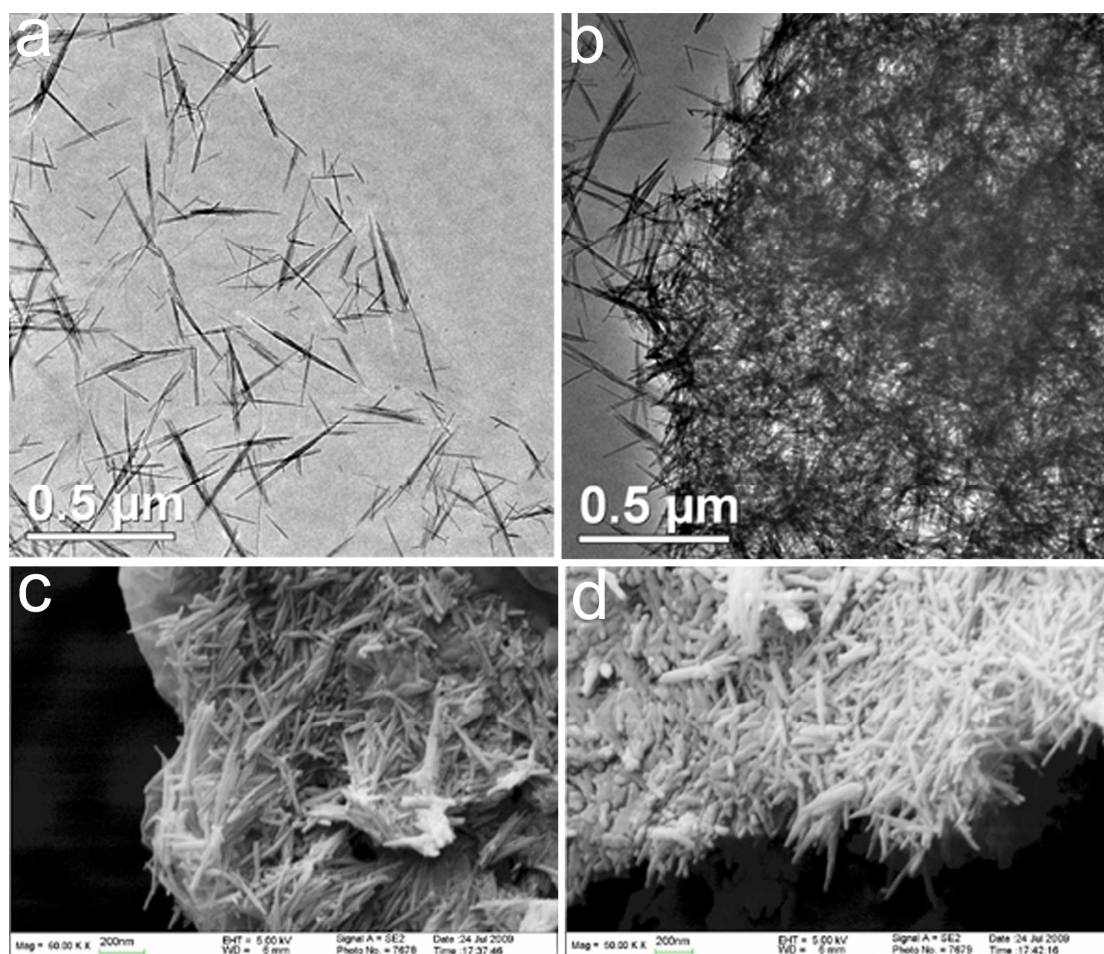

**Figure. 5S.** TEM and FESEM images of CMG<sub>3</sub> (a, c) and CMG<sub>15</sub> (b, d).
